# Supplementary material for: Design of hydrogels for delayed antibody release utilizing hydrophobic association and Diels–Alder chemistry in tandem
Source: Royal Society of Chemistry journal article supplement (doi:10.1039/c6tb00223d), 2016-01-01
Supplement: c6tb00223d1.pdf [file c6tb00223d1.pdf]

## Supplementary spectroscopic data

Gregoritza et al. Design of hydrogels for delayed antibody release utilizing hydrophobic association and Diels-Alder chemistry in tandem

### 8armPEG40k-furan

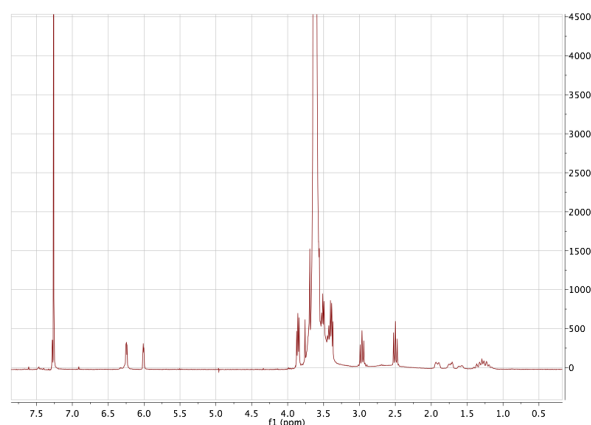

$^1\text{H-NMR}$  ( $\text{CDCl}_3$ , 300 MHz):  $\delta$  (ppm) = 2.47 (t, 16H,  $-\text{C}(\text{O})\text{CH}_2\text{CH}_2\text{Ar}$ ), 2.97 (t, 16H,  $-\text{C}(\text{O})\text{CH}_2\text{CH}_2\text{Ar}$ ), 3.62 (s,  $-\text{OCH}_2\text{CH}_2-$ ), 6.01 (s, 8H, Ar), 6.24 (s, 8H, Ar), 7.28 (s, 8H, Ar).

### 8armPEG40k-maleimide

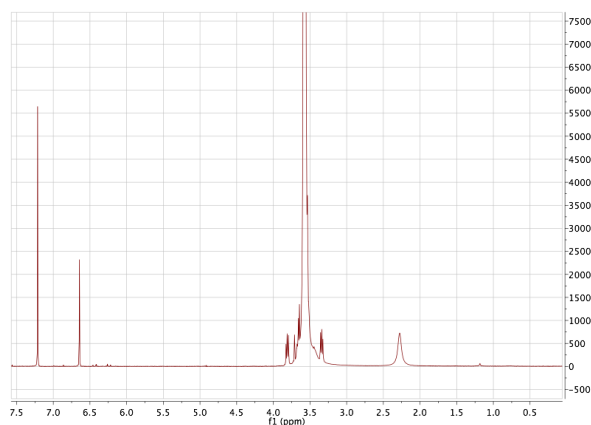

$^1\text{H-NMR}$  ( $\text{CDCl}_3$ , 300 MHz):  $\delta$  (ppm) = 3.62 (s,  $-\text{OCH}_2\text{CH}_2-$ ), 6.64 (s, 16H,  $-\text{C}(\text{O})\text{CH}=\text{CHC}(\text{O})-$ ).

### 8armPEG40k-C<sub>6</sub>-NH-Boc

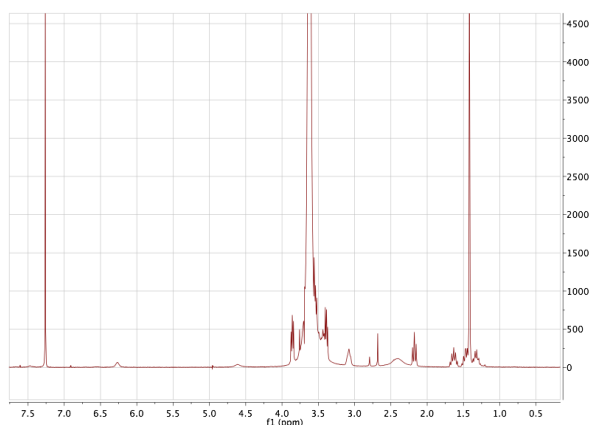

<sup>1</sup>H-NMR (CDCl<sub>3</sub>, 300 MHz): δ (ppm) = 1.32 (m, 16H, -C(O)CH<sub>2</sub>CH<sub>2</sub>CH<sub>2</sub>CH<sub>2</sub>CH<sub>2</sub>NH-), 1.42 (s, 72H, -NHC(O)OC(CH<sub>3</sub>)<sub>3</sub>), 1.47 (m, 16H, -C(O)CH<sub>2</sub>CH<sub>2</sub>CH<sub>2</sub>CH<sub>2</sub>CH<sub>2</sub>NH), 1.63 (m, 16H, -C(O)CH<sub>2</sub>CH<sub>2</sub>CH<sub>2</sub>CH<sub>2</sub>CH<sub>2</sub>NH-), 2.17 (m, 16H, -C(O)CH<sub>2</sub>CH<sub>2</sub>CH<sub>2</sub>CH<sub>2</sub>CH<sub>2</sub>NH-), 3.08 (m, 16H, -C(O)CH<sub>2</sub>CH<sub>2</sub>CH<sub>2</sub>CH<sub>2</sub>CH<sub>2</sub>NH-), 3.62 (s, -OCH<sub>2</sub>CH<sub>2</sub>-).

### 8armPEG40k-C<sub>6</sub>-furan

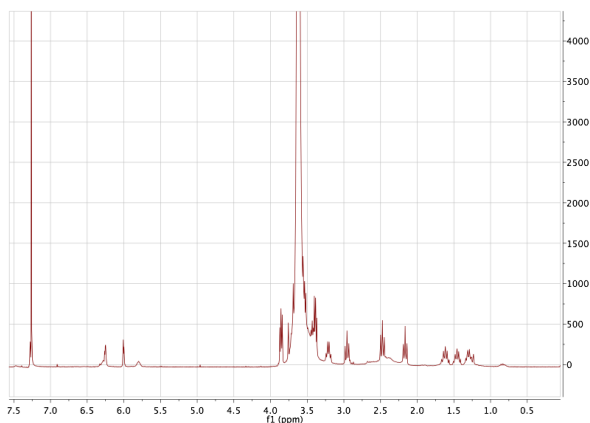

<sup>1</sup>H-NMR (CDCl<sub>3</sub>, 300 MHz): δ (ppm) = 1.29 (m, 16H, -C(O)CH<sub>2</sub>CH<sub>2</sub>CH<sub>2</sub>CH<sub>2</sub>CH<sub>2</sub>NH-), 1.46 (m, 16H, -C(O)CH<sub>2</sub>CH<sub>2</sub>CH<sub>2</sub>CH<sub>2</sub>CH<sub>2</sub>NH-), 1.62 (m, 16H, -C(O)CH<sub>2</sub>CH<sub>2</sub>CH<sub>2</sub>CH<sub>2</sub>CH<sub>2</sub>NH-), 2.17 (m, 16H, -C(O)CH<sub>2</sub>CH<sub>2</sub>CH<sub>2</sub>CH<sub>2</sub>CH<sub>2</sub>NH-), 2.47 (t, 16H, -C(O)CH<sub>2</sub>CH<sub>2</sub>Ar), 2.96 (t, 16H, -C(O)CH<sub>2</sub>CH<sub>2</sub>Ar), 3.20 (m, 16H, -C(O)CH<sub>2</sub>CH<sub>2</sub>CH<sub>2</sub>CH<sub>2</sub>CH<sub>2</sub>NH-), 3.62 (s, -OCH<sub>2</sub>CH<sub>2</sub>-), 6.00 (s, 8H, Ar), 6.25 (s, 8H, Ar), 7.27 (s, 8H, Ar).

### 8armPEG40k-C<sub>6</sub>-maleimide

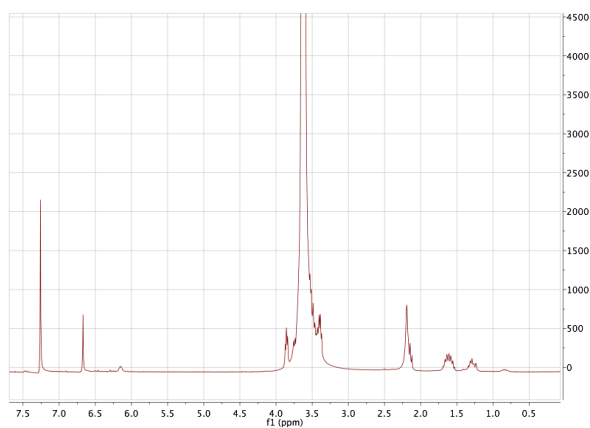

<sup>1</sup>H-NMR (CDCl<sub>3</sub>, 300 MHz): δ (ppm) = 1.29 (m, 16H, -C(O)CH<sub>2</sub>CH<sub>2</sub>CH<sub>2</sub>CH<sub>2</sub>CH<sub>2</sub>N-),  
1.61 (m, 32H, -C(O)CH<sub>2</sub>CH<sub>2</sub>CH<sub>2</sub>CH<sub>2</sub>CH<sub>2</sub>N-), 2.15 (m, 16H, -C(O)CH<sub>2</sub>CH<sub>2</sub>CH<sub>2</sub>CH<sub>2</sub>CH<sub>2</sub>N-),  
3.62 (s, -OCH<sub>2</sub>CH<sub>2</sub>-), 6.67 (s, 16H, -C(O)CH=CHC(O)-).

### 8armPEG40k-C<sub>12</sub>-NH-Boc

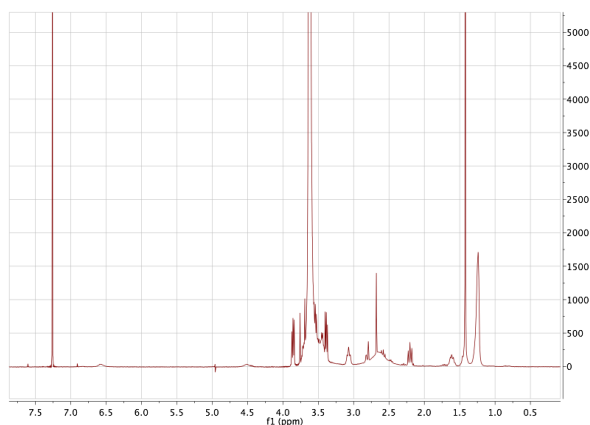

<sup>1</sup>H-NMR (CDCl<sub>3</sub>, 300 MHz): δ (ppm) = 1.24 (m, 112H, -C(O)CH<sub>2</sub>(CH<sub>2</sub>)<sub>7</sub>CH<sub>2</sub>CH<sub>2</sub>CH<sub>2</sub>NH-),  
1.42 (s, 72H, -NHC(O)OC(CH<sub>3</sub>)<sub>3</sub>), 1.43 (m, 16H,  
-C(O)CH<sub>2</sub>(CH<sub>2</sub>)<sub>7</sub>CH<sub>2</sub>CH<sub>2</sub>CH<sub>2</sub>NH), 1.60 (m, 16H, -C(O)CH<sub>2</sub>(CH<sub>2</sub>)<sub>7</sub>CH<sub>2</sub>CH<sub>2</sub>CH<sub>2</sub>NH-),  
2.20 (m, 16H, -C(O)CH<sub>2</sub>(CH<sub>2</sub>)<sub>7</sub>CH<sub>2</sub>CH<sub>2</sub>CH<sub>2</sub>NH-), 3.08 (m, 16H,  
-C(O)CH<sub>2</sub>(CH<sub>2</sub>)<sub>7</sub>CH<sub>2</sub>CH<sub>2</sub>CH<sub>2</sub>NH-), 3.62 (s, -OCH<sub>2</sub>CH<sub>2</sub>-).

## 8armPEG40k-C<sub>12</sub>-furan

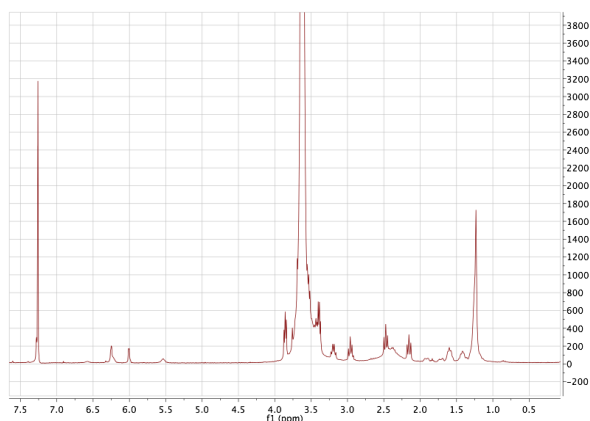

<sup>1</sup>H-NMR (CDCl<sub>3</sub>, 300 MHz): δ (ppm) = 1.23 (m, 112H, -C(O)CH<sub>2</sub>(CH<sub>2</sub>)<sub>7</sub>CH<sub>2</sub>CH<sub>2</sub>CH<sub>2</sub>NH-), 1.42 (m, 16H, -C(O)CH<sub>2</sub>(CH<sub>2</sub>)<sub>7</sub>CH<sub>2</sub>CH<sub>2</sub>CH<sub>2</sub>NH-), 1.60 (m, 16H, -C(O)CH<sub>2</sub>(CH<sub>2</sub>)<sub>7</sub>CH<sub>2</sub>CH<sub>2</sub>CH<sub>2</sub>NH-), 2.15 (m, 16H, -C(O)CH<sub>2</sub>(CH<sub>2</sub>)<sub>7</sub>CH<sub>2</sub>CH<sub>2</sub>CH<sub>2</sub>NH-), 2.47 (t, 16H, -C(O)CH<sub>2</sub>CH<sub>2</sub>Ar), 2.96 (t, 16H, -C(O)CH<sub>2</sub>CH<sub>2</sub>Ar), 3.20 (m, 16H, -C(O)CH<sub>2</sub>(CH<sub>2</sub>)<sub>7</sub>CH<sub>2</sub>CH<sub>2</sub>CH<sub>2</sub>NH-), 3.62 (s, -OCH<sub>2</sub>CH<sub>2</sub>-), 6.00 (s, 8H, Ar), 6.26 (s, 8H, Ar).

## 8armPEG40k-C<sub>12</sub>-maleimide

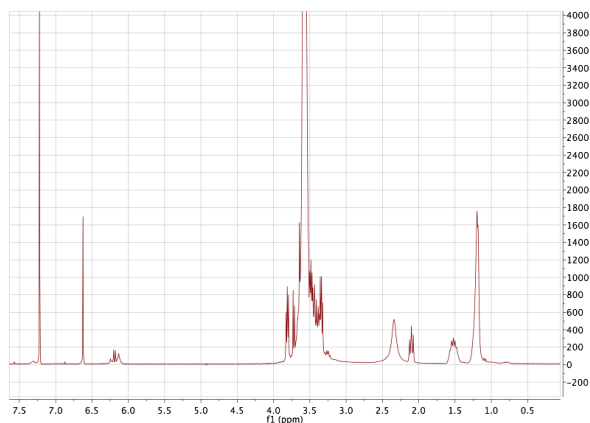

<sup>1</sup>H-NMR (CDCl<sub>3</sub>, 300 MHz): δ (ppm) = 1.23 (m, 112H, -C(O)CH<sub>2</sub>(CH<sub>2</sub>)<sub>7</sub>CH<sub>2</sub>CH<sub>2</sub>CH<sub>2</sub>N-), 1.56 (m, 32H, -C(O)CH<sub>2</sub>(CH<sub>2</sub>)<sub>7</sub>CH<sub>2</sub>CH<sub>2</sub>CH<sub>2</sub>N-), 2.14 (m, 16H, -C(O)CH<sub>2</sub>(CH<sub>2</sub>)<sub>7</sub>CH<sub>2</sub>CH<sub>2</sub>CH<sub>2</sub>N-), 3.62 (s, -OCH<sub>2</sub>CH<sub>2</sub>-), 6.66 (s, 16H, -C(O)CH=CHC(O)-).
